# Supplementary material for: GSK3β Regulates Brain Energy Metabolism
Source: PubMed Central journal article supplement — Cell Rep. Author manuscript; Available in PMC 2018 Aug 8. (PMC6082412; doi:10.1016/j.celrep.2018.04.045), 2018-05-15
Supplement: NIHMS971238-supplement-1.pdf [file NIHMS971238-supplement-1.pdf]

**Cell Reports, Volume 23**

## **Supplemental Information**

### **GSK3 $\beta$ Regulates Brain Energy Metabolism**

**Stephen A. Martin, Dylan C. Souder, Karl N. Miller, Josef P. Clark, Abdul Kader Sagar, Kevin W. Eliceiri, Luigi Puglielli, T. Mark Beasley, and Rozalyn M. Anderson**

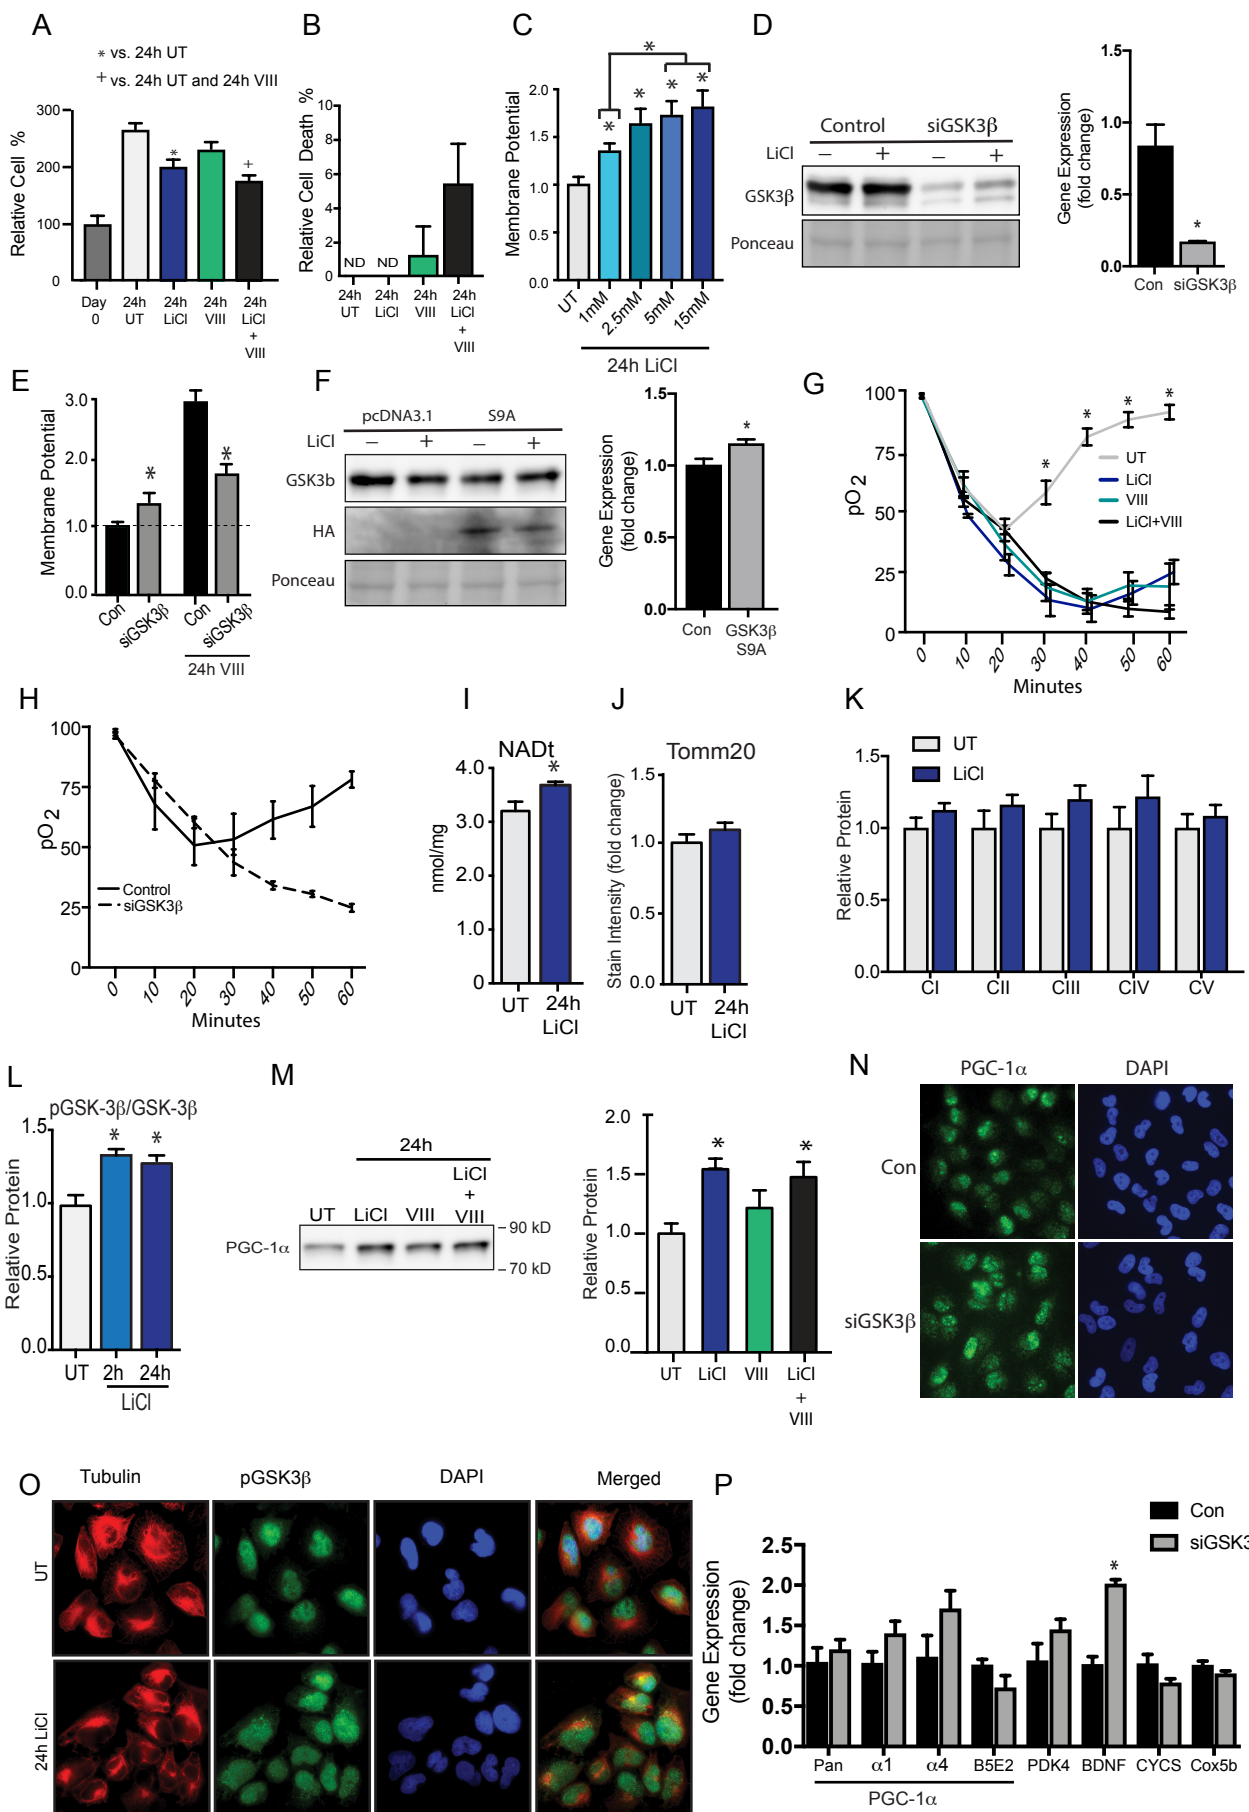

**Figure S1. (related to Fig. 1).** Data show the impact of lithium on cell proliferation (A) and (B) cell death. (C) JC-1 measurement of mitochondrial membrane potential following LiCl dose-response in H4 glioma. (D) GSK3β protein and gene expression 48 hours following GSK3β siRNA transfection. (E) JC-1 measurement of mitochondrial membrane potential following GSK3b inhibitor VIII (15μM) in H4 glioma with GSK3β interference. (F) GSK3β protein and gene expression 48 hours following GSK3β-S9A transfection. (G) Basal oxygen consumption over time in H4 glioma treated with DMSO, LiCl (15mM), inhibitor VIII (15μM), and both LiCl (15mM) and inhibitor VIII (15μM), and (H) in H4 glioma with GSK3β interference. (I) Total NAD (NADt) levels, and immunodetection of Tomm 20 (J), complexes I, II, III, IV, and V proteins of the ETS (K), and pGSK3β/GSK3β ratio (L) following the indicated LiCl treatment (15mM) in H4 glioma. (M) Detection of PGC-1α protein in H4 glioma following the indicated treatment. (N) Immunodetection of PGC-1α in H4 glioma with GSK3β interference. (O) Immunodetection of tubulin and pGSK3β following 24h LiCl treatment in H4 glioma. (P) Gene expression of PGC-1α and indicated transcripts in H4 glioma with GSK3β interference. (n= 3-6 biological replicates per assay; data shown as average +/- SEM; \*p<0.05 ANOVA, independent sample t-test).

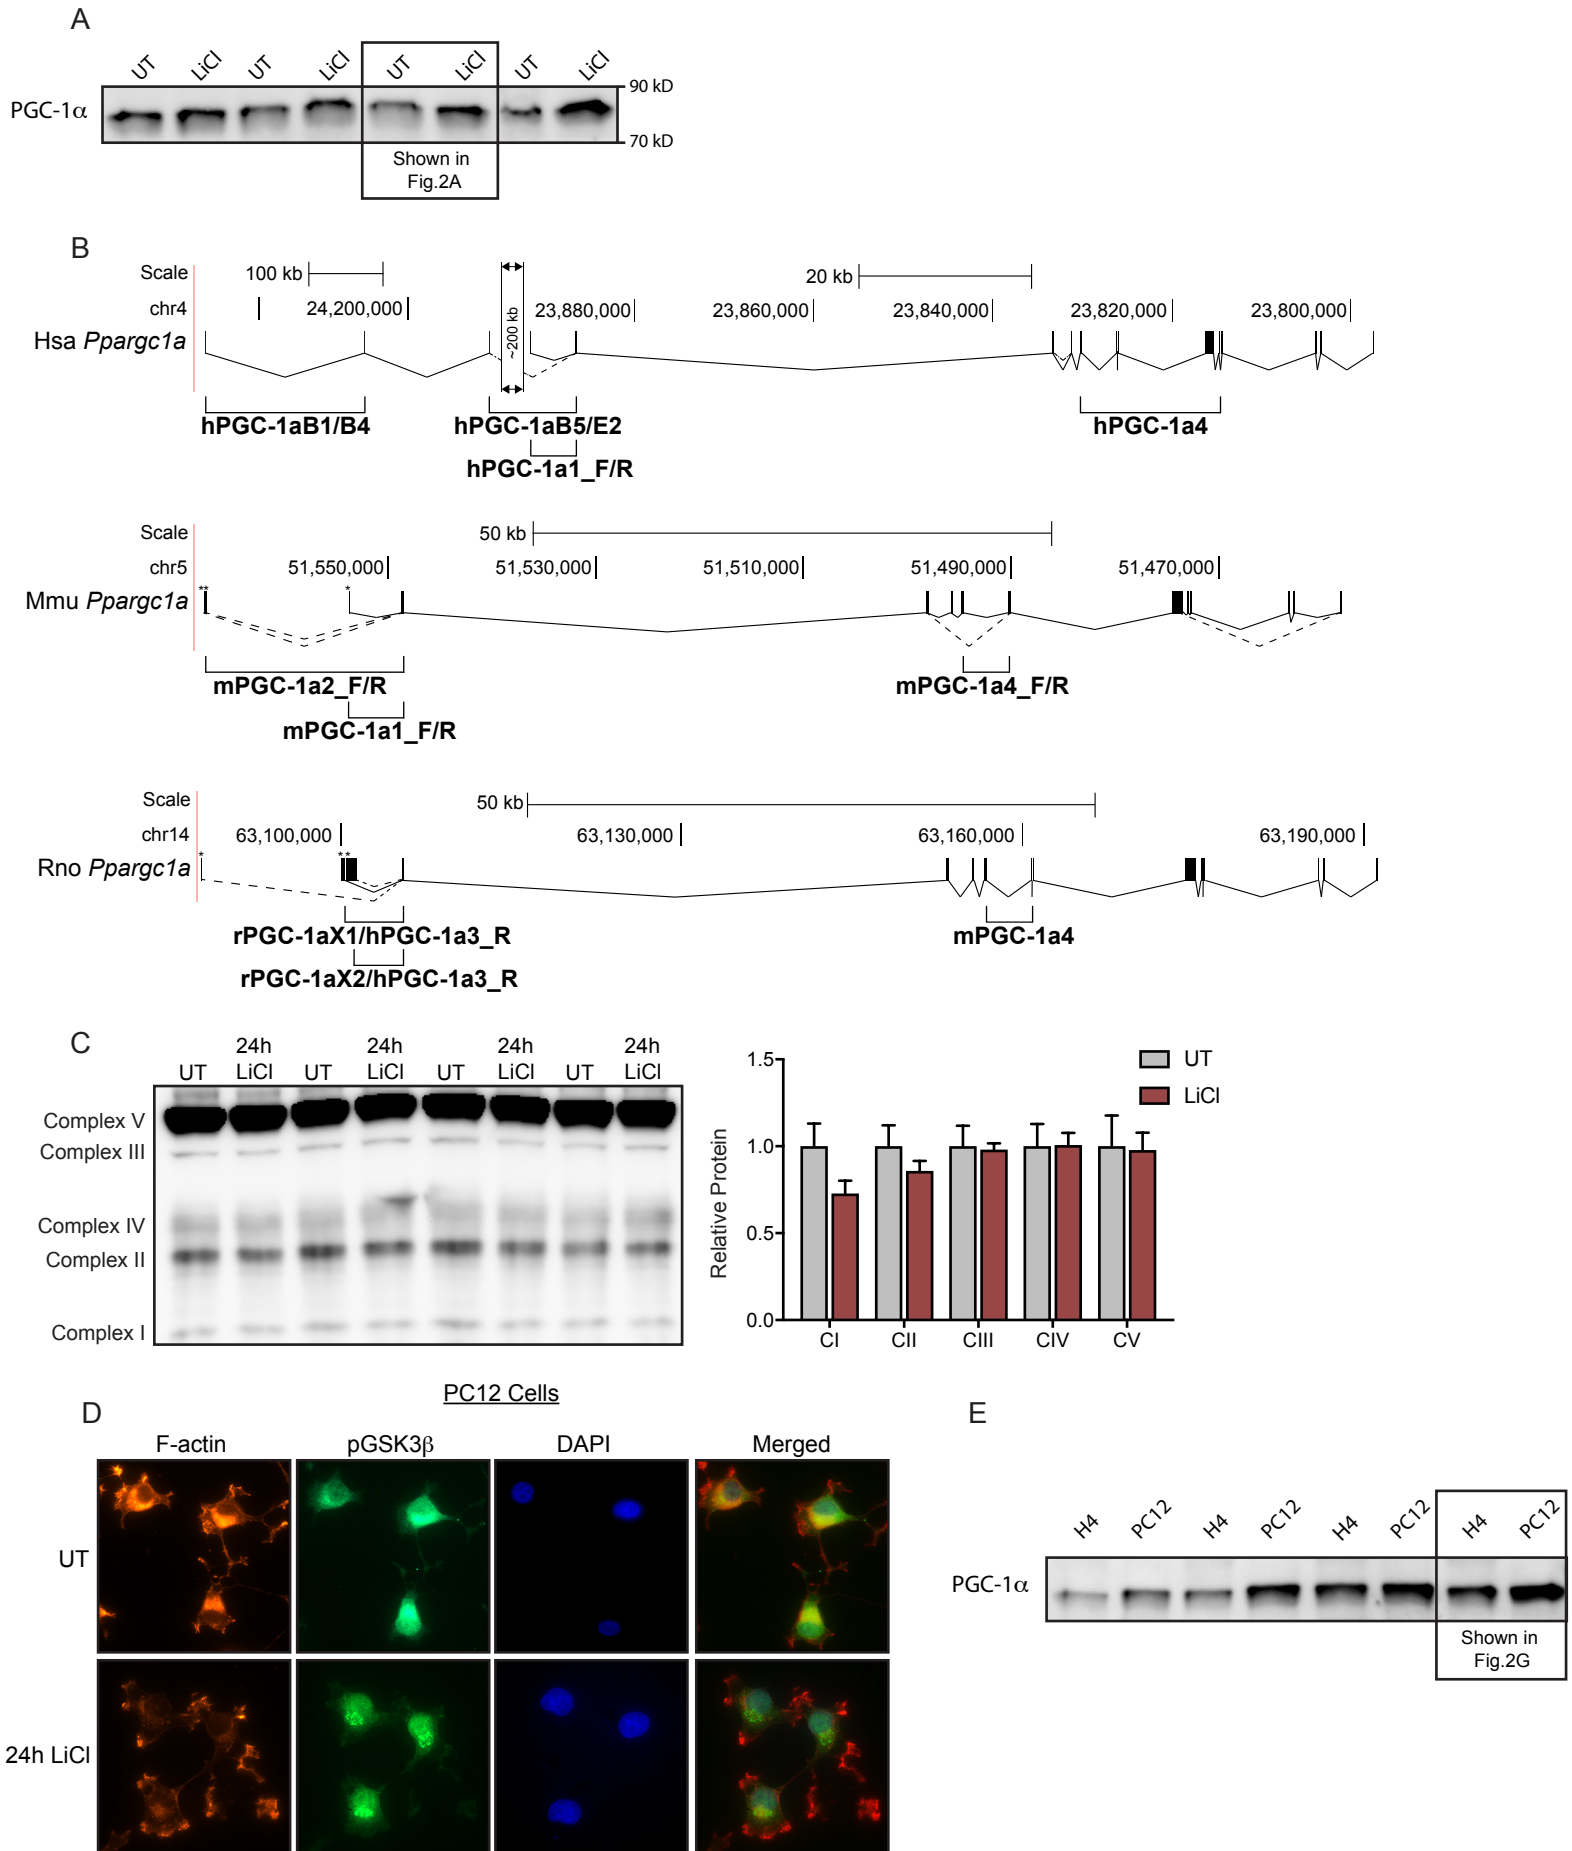

**Figure S2. (related to Fig. 2).** (A) Immunodetection of PGC-1 $\alpha$  following 24h LiCl treatment in PC12-derived neurons (B) Gene structures of PGC-1 $\alpha$  exons and alternative splicing for human, mouse and rat genomes. Brackets below each genome represent primer pairs used (Primer Table) to detect different PGC-1 $\alpha$  isoforms throughout study. (\*) indicates possible and validated transcriptional start sites. (C) Complexes I, II, III, IV, and V proteins of the ETS following the 24h LiCl treatment. (D) Immunodetection of tubulin and pGSK3 $\beta$  following 24h LiCl treatment in PC12-derived neurons. (n = 3-6 biological replicates per assay; data shown as average  $\pm$  SEM).

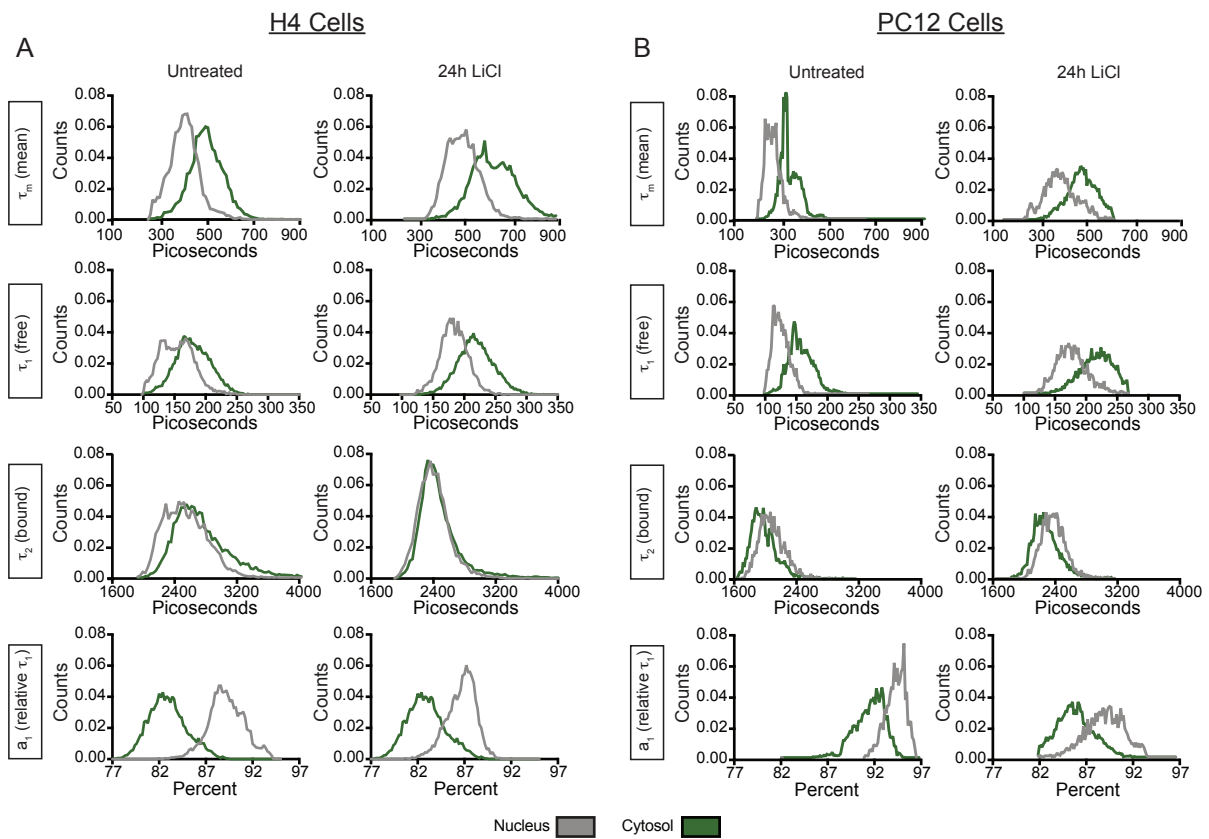

**Figure S3. (related to Fig. 3).** Impact of GSK3 $\beta$  inhibition on fluorescent lifetime components parameters in H4 glioma and PC12-derived neurons. (A) Distributions of mean fluorescence lifetime  $\tau_m$  (top rows), short component  $\tau_1$  (upper middle rows), long component  $\tau_2$  (lower middle rows), and  $a_1$ , the relative contribution of  $\tau_1$  to  $\tau_m$  (bottom row) following LiCl treatment (15mM) within the nucleus and cytoplasm of (A) H4 glioma and (B) PC12-derived neurons. (n= 6-8 biological replicates per measure; data shown as distribution or as average  $\pm$  SEM; \*p<0.05, linear mixed model).



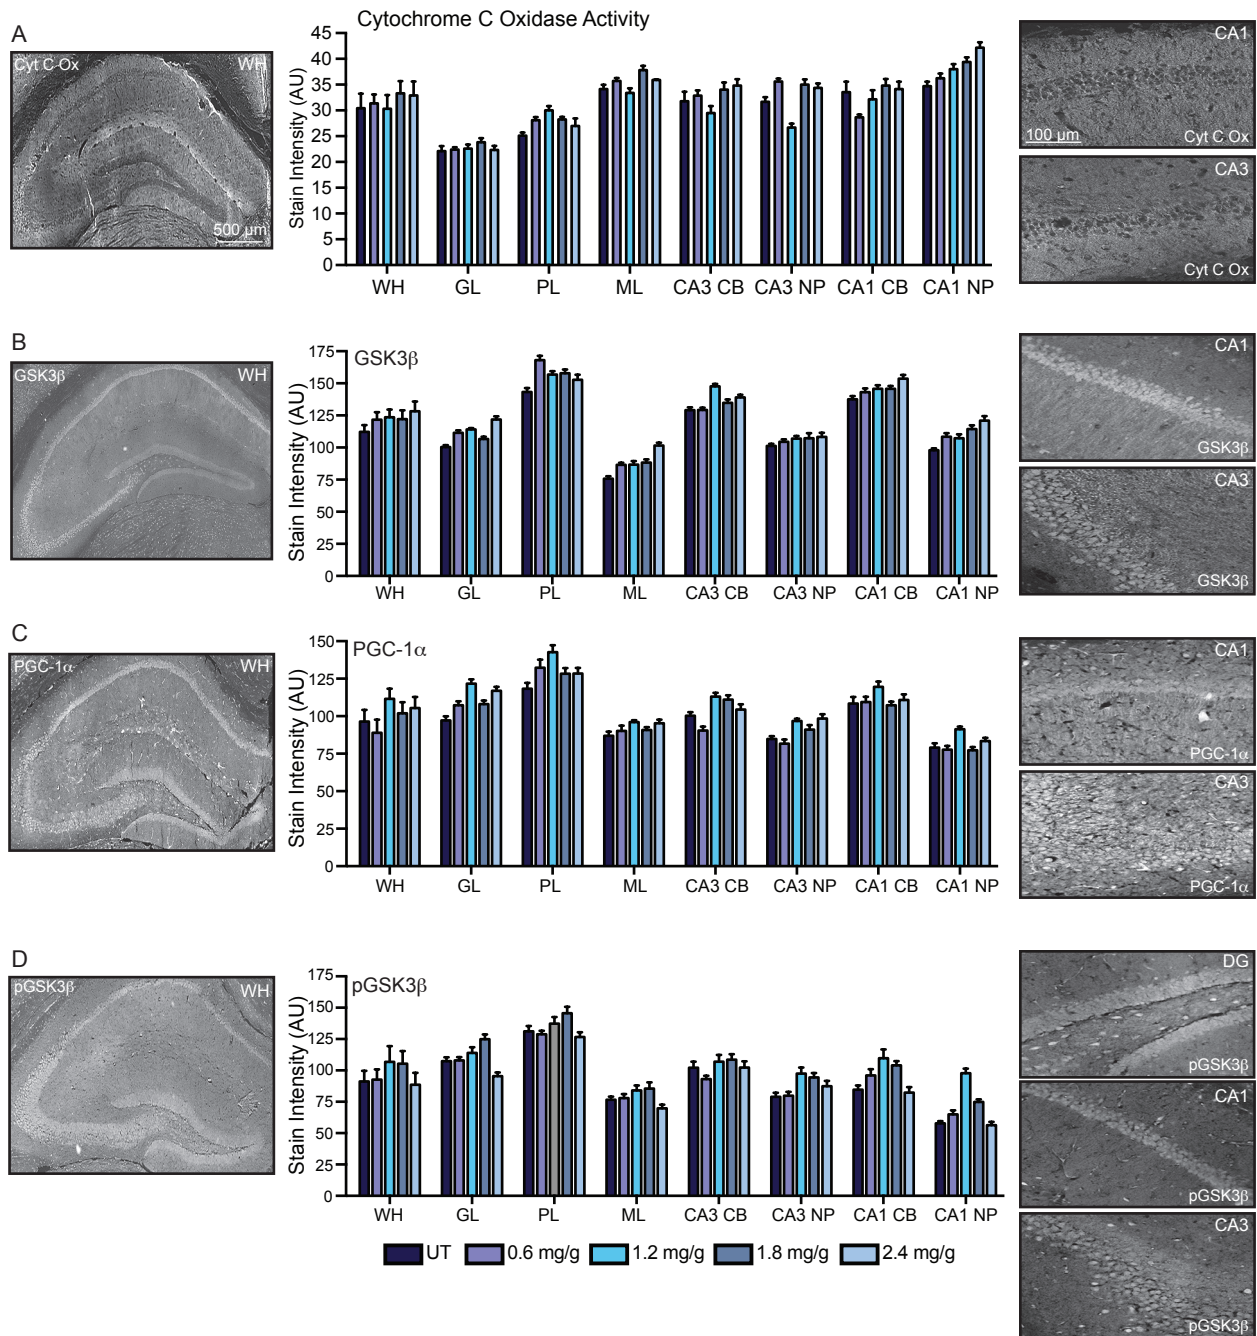

**Figure S4. (related to Fig. 4).** Representative images and quantification of (A) Cytochrome C oxidase activity (B) GSK3 $\beta$  protein immunodetection (C) PGC-1 $\alpha$  immunodetection, and (D) pGSK3 $\beta$  immunodetection in the indicated hippocampal regions of mice fed the Li<sub>2</sub>CO<sub>3</sub> (n = 4-6 mice per Li<sub>2</sub>CO<sub>3</sub> dosage; data shown as average +/- SEM or distributions; \*p<0.05, linear mixed models. WH, whole hippocampus; DG, dentate gyrus; GL, granular layer; PL, polymorphic layer; ML, molecular layer; CB, cell bodies; NP, neuropil).

A

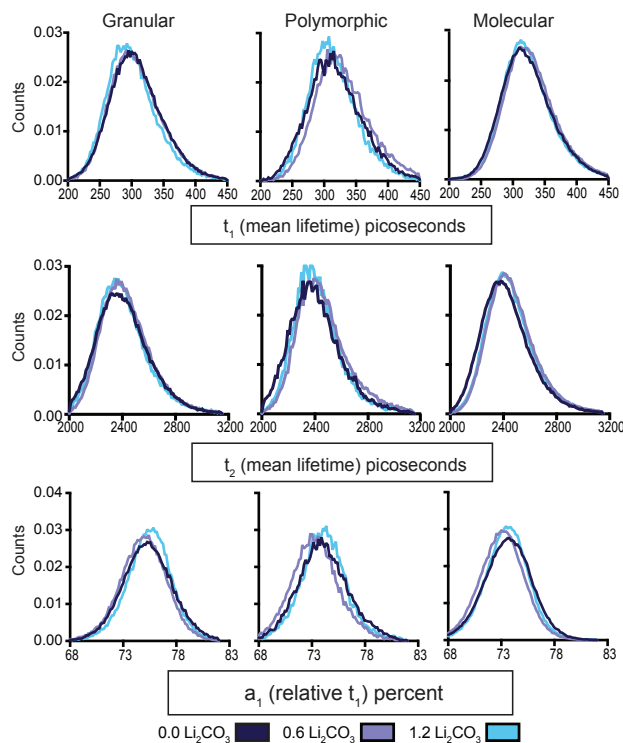

B

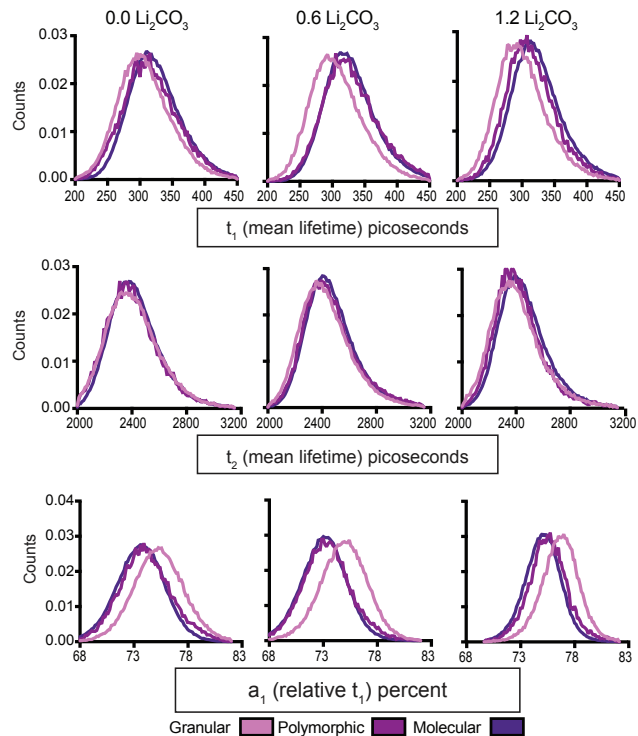

**Figure S5. (related to Fig. 4).** (A, B) Distributions of fluorescence lifetime short component  $\tau_1$  (upper middle rows), long component  $\tau_2$  (lower middle rows), and  $a_1$ , the relative contribution of  $\tau_1$  to  $\tau_m$  (bottom row) separated by (A) region and (B) dosage in the dentate gyrus of mice fed  $\text{Li}_2\text{CO}_3$ . (n = 4-6 mice per  $\text{Li}_2\text{CO}_3$  dosage; data shown as average  $\pm$  SEM or distributions; \* $p < 0.05$ , linear mixed models.)

**Table S1. (related to Fig. 1).** Lithium treatment alters cellular respiration in H4 glioma cells.

| <b>Time-point<br/>(minute)</b> | <b>ANOVA</b>                              | <b>UT vs. 2h<br/>LiCl<br/>(p-value)</b> | <b>UT vs. 24h<br/>LiCl<br/>(p-value)</b> | <b>2h vs. 24h<br/>LiCl<br/>(p-value)</b> |
|--------------------------------|-------------------------------------------|-----------------------------------------|------------------------------------------|------------------------------------------|
| (Basal)<br>6                   | $F_{(2, 11)} = 14.99$ ;<br>$p = 0.001^*$  | .029*                                   | .001*                                    | .106                                     |
| 12                             | $F_{(2, 11)} = 14.878$ ;<br>$p = 0.001^*$ | .037*                                   | .001*                                    | .083                                     |
| 18                             | $F_{(2, 11)} = 21.073$ ;<br>$p = 0.000^*$ | .008*                                   | .000*                                    | .085                                     |
| (oligomycin)<br>24             | $F_{(2, 11)} = 17.798$ ;<br>$p = 0.001^*$ | .002*                                   | .001*                                    | .864                                     |
| 30                             | $F_{(2, 11)} = 8.266$ ;<br>$p = 0.009^*$  | .043*                                   | .009*                                    | .575                                     |
| 36                             | $F_{(2, 11)} = 12.025$ ;<br>$p = 0.003^*$ | .220                                    | .002*                                    | .034*                                    |
| (FCCP)<br>42                   | $F_{(2, 11)} = 31.328$ ;<br>$p = 0.000^*$ | .001*                                   | .000*                                    | .264                                     |
| 48                             | $F_{(2, 11)} = 24.093$ ;<br>$p = 0.000^*$ | .003*                                   | .000*                                    | .124                                     |
| 54                             | $F_{(2, 11)} = 20.090$ ;<br>$p = 0.000^*$ | .007*                                   | .000*                                    | .140                                     |
| (Rotenone/Antimycin)<br>60     | $F_{(2, 11)} = 10.513$ ;<br>$p = 0.004^*$ | .979                                    | .010*                                    | .007*                                    |
| 66                             | $F_{(2, 11)} = 11.285$ ;<br>$p = 0.004^*$ | .979                                    | .006*                                    | .008*                                    |
| 72                             | $F_{(2, 11)} = 11.825$ ;<br>$p = 0.004^*$ | .912                                    | .006*                                    | .010*                                    |

\*p<0.05

**Table S2. (related to Fig. 3).** Lithium regulates NAD(P)H metabolism in H4 glioma and PC12-derived neurons.

| Lifetime Component          | Lithium Main Effect                   | Cellular Compartment Main Effect      | Lithium x Cellular Compartment Interaction |
|-----------------------------|---------------------------------------|---------------------------------------|--------------------------------------------|
| <b>H4 glioma Cells</b>      |                                       |                                       |                                            |
| $\tau_m$                    | $F_{(1,24)}=397.64;$<br>$p<0.0001^*$  | $F_{(1,24)}=1442.81;$<br>$p<0.0001^*$ | $F_{(1,24)}=39.10;$<br>$p<0.0001^*$        |
| $\tau_1$                    | $F_{(1,24)}=22.687;$<br>$p<0.0001^*$  | $F_{(1,24)}=1065.98;$<br>$p<0.0001^*$ | $F_{(1,24)}=20.40;$<br>$p<0.0001^*$        |
| $\tau_2$                    | $F_{(1,24)}=52.63;$<br>$p<0.0001^*$   | $F_{(1,24)}=99.67;$<br>$p<0.0001^*$   | $F_{(1,24)}=38.26;$<br>$p<0.0001^*$        |
| $a_1$                       | $F_{(1,24)}=351.75;$<br>$p<0.0001^*$  | $F_{(1,24)}=2088.94;$<br>$p<0.0001^*$ | $F_{(1,24)}=13.10;$<br>$p<0.0001^*$        |
| <b>PC12-derived neurons</b> |                                       |                                       |                                            |
| $\tau_m$                    | $F_{(1,20)}=1347.86;$<br>$p<0.0001^*$ | $F_{(1,20)}=1421.16;$<br>$p<0.0001^*$ | $F_{(1,20)}=36.90;$<br>$p<0.0001^*$        |
| $\tau_1$                    | $F_{(1,20)}=753.53;$<br>$p<0.0001^*$  | $F_{(1,20)}=1795.27;$<br>$p<0.0001^*$ | $F_{(1,20)}=33.72;$<br>$p<0.0001^*$        |
| $\tau_2$                    | $F_{(1,20)}=367.49;$<br>$p<0.0001^*$  | $F_{(1,20)}=230.66;$<br>$p<0.0001^*$  | $F_{(1,20)}=0.11;$<br>$P=0.7461$           |
| $a_1$                       | $F_{(1,20)}=1049.76;$<br>$p<0.0001^*$ | $F_{(1,20)}=1720.55;$<br>$p<0.0001^*$ | $F_{(1,20)}=19.28;$<br>$p<0.0001^*$        |
| * $p<0.05$                  |                                       |                                       |                                            |

**Table S3. (related to Fig. 4).** Dietary Li<sub>2</sub>CO<sub>3</sub>-induced body mass and composition changes.

| <b>Li<sub>2</sub>CO<sub>3</sub><br/>Dosage<br/>(mg/g diet)</b> | <b>Pre-intervention<br/>body mass (g)</b> | <b>Post-intervention<br/>body mass (g)</b> | <b>Body mass Δ<br/>(%)</b> | <b>Post-<br/>intervention<br/>body fat (%)</b> |
|----------------------------------------------------------------|-------------------------------------------|--------------------------------------------|----------------------------|------------------------------------------------|
| <b>0.0</b>                                                     | 25.74 ± 0.52                              | 36.47 ± 0.7                                | 42.17 ± 3.80               | 35.08 ± 1.48                                   |
| <b>0.6</b>                                                     | 26.31 ± 0.62                              | 37.80 ± 0.7                                | 46.40 ± 3.43               | 35.05 ± 0.87                                   |
| <b>1.2</b>                                                     | 26.02 ± 0.52                              | 37.40 ± 0.89                               | 45.84 ± 4.59               | 34.42 ± 1.02                                   |
| <b>1.8</b>                                                     | 25.92 ± 0.53                              | 32.51 ± 0.81 <sup>a</sup>                  | 25.59 ± 2.79 <sup>a</sup>  | 29.02 ± 1.39 <sup>a</sup>                      |
| <b>2.4</b>                                                     | 25.82 ± 0.52                              | 26.84 ± 0.52 <sup>ab</sup>                 | 4.24 ± 2.50 <sup>ab</sup>  | 21.40 ± 0.42 <sup>ab</sup>                     |

Mean ± SEM

<sup>a</sup> p<0.001 vs. 0.0, 0.6, 1.2 mg/g dosages; <sup>ab</sup> p<0.001 vs. 1.8 mg/g dosage

**Table S4. (related to Fig. 4).** Dietary Li<sub>2</sub>CO<sub>3</sub> induced changes in hippocampal immunohistochemistry.

| <b>Stain</b>                          | <b>Lithium Dosage Main Effect</b>        | <b>Region Main Effect</b>                  | <b>Dosage x Region Interaction</b>          |
|---------------------------------------|------------------------------------------|--------------------------------------------|---------------------------------------------|
| <b>Cytochrome C Oxidase</b>           | F <sub>(4,21)</sub> =14.22;<br>p<0.0001* | F <sub>(6,130)</sub> =188.6;<br>p<0.0001*  | F <sub>(23,130)</sub> =102.98;<br>P<0.0001* |
| <b>PGC-1<math>\alpha</math></b>       | F <sub>(4,21)</sub> =0.63;<br>p=0.6486   | F <sub>(6,119)</sub> =58.98;<br>p<0.0001*  | F <sub>(21,119)</sub> =27.80;<br>p<0.0001*  |
| <b>GSK-3<math>\beta</math></b>        | F <sub>(4,21)</sub> =2.78;<br>p=0.0536   | F <sub>(6,124)</sub> =352.45;<br>p<0.0001* | F <sub>(21,124)</sub> =2.29;<br>p<0.0001*   |
| <b>Phospho-GSK3<math>\beta</math></b> | F <sub>(4,22)</sub> =0.70;<br>p=0.602    | F <sub>(6,124)</sub> =65.42;<br>p<0.0001*  | F <sub>(22,124)</sub> =687.25;<br>p<0.0001* |

\*p<0.05

**Table S5. (related to Fig. 4).** Dietary Li<sub>2</sub>CO<sub>3</sub> induced changes in hippocampal NAD(P)H metabolism

| <b>Lifetime Component</b> | <b>Lithium Dosage Main Effect</b>        | <b>Region Main Effect</b>                 | <b>Dosage x Region Interaction</b>       |
|---------------------------|------------------------------------------|-------------------------------------------|------------------------------------------|
| $\tau_m$                  | F <sub>(2,13)</sub> =28.47;<br>p<0.0001* | F <sub>(2,13)</sub> =342.27;<br>p<0.0001* | F <sub>(4,13)</sub> =8.01;<br>P=0.0018*  |
| $\tau_1$                  | F <sub>(2,13)</sub> =4.05;<br>p=0.0429*  | F <sub>(2,13)</sub> =96.65;<br>p<0.0001*  | F <sub>(4,13)</sub> =3.81;<br>P=0.0292*  |
| $\tau_2$                  | F <sub>(2,13)</sub> =9.27;<br>p=0.0032*  | F <sub>(2,13)</sub> =14.26;<br>P=0.0005*  | F <sub>(4,13)</sub> =2.29;<br>P=0.115    |
| $a_1$                     | F <sub>(2,13)</sub> =57.69;<br>p<0.0001* | F <sub>(2,13)</sub> =391.38;<br>p<0.0001* | F <sub>(4,13)</sub> =19.02;<br>p<0.0001* |

\*p<0.05

**Table S6. (Related to STAR Methods and Key Resources Table) List of primer sequences.**

| <b>H4 Primers (Human)</b>                    | <b>Source</b>     | <b>Catalog #</b> |
|----------------------------------------------|-------------------|------------------|
| NRF1                                         | ThermoFisher      | Hs00602161_m1    |
| TFAM                                         | ThermoFisher      | Hs00273372_s1    |
| PKD4                                         | ThermoFisher      | Hs01037712_m1    |
| IDH3a                                        | ThermoFisher      | Hs00194253_m1    |
| COX5b                                        | ThermoFisher      | Hs00426950_g1    |
| CYCS                                         | ThermoFisher      | Hs01588974_g1    |
| SCD1                                         | ThermoFisher      | Hs01682761_m1    |
| FASN                                         | ThermoFisher      | Hs01005622_m1    |
| ACACA                                        | ThermoFisher      | Hs01046047_m1    |
| ACADL                                        | ThermoFisher      | Hs00155630_m1    |
| ACADM                                        | ThermoFisher      | Hs00936584_m1    |
| GSK3b                                        | ThermoFisher      | Hs01047719_m1    |
| BDNF                                         | ThermoFisher      | Hs02718934_s1    |
| 18S F- GTAACCCGTTGAACCCATT                   | UW Biotech Center | N/A              |
| 18S R- CCATCCAATCGGTAGTAGCG                  | UW Biotech Center | N/A              |
| hPGC-1a Pan F- CAG CCT CTT TGC CCA GAT CTT   | UW Biotech Center | N/A              |
| hPGC-1a Pan R- TCA CTG CAC CAC TTG AGT CCA C | UW Biotech Center | N/A              |
| hPGC-1a1 F- ATG GAG TGA CAT CGA GTG TGC T    | UW Biotech Center | N/A              |
| hPGC-1a1 R- GAG TCC ACC CAG AAA GCT GT       | UW Biotech Center | N/A              |
| hPGC-1a2 F- AGT CCA CCC AGA AAG CTG TCT      | UW Biotech Center | N/A              |
| hPGC-1a2 R- ATG AAT GAC ACA CAT GTT GGG      | UW Biotech Center | N/A              |
| hPGC-1a3 F- CTG CAC CTA GGA GGC TTT ATG C    | UW Biotech Center | N/A              |
| hPGC-1a3 R- CAA TCC ACC CAG AAA GCT GTC T    | UW Biotech Center | N/A              |
| hPGC-1a4 F- TCA CAC CAA ACC CAC AGA GA       | UW Biotech Center | N/A              |
| hPGC-1a4 R- CTG GAA GAT ATG GCA CAT          | UW Biotech Center | N/A              |
| PGC-1a B5E2 F- CCTGGCTGCTGCTTTGGTA           | UW Biotech Center | N/A              |
| PGC-1a B5E2 R- GCTGTCTGTATCCAAGTCGT          | UW Biotech Center | N/A              |
| PGC-1a B1B4 F- TACAACACTACGGCTCCTCCTGG       | UW Biotech Center | N/A              |
| PGC-1a B1B4 R- TACCCTTCATCCATGGGGCTC         | UW Biotech Center | N/A              |
| PGC-1a4 R- CTGGAAGATATGGCACAT                | UW Biotech Center | N/A              |
| <b>PC12 Primers (Rat)</b>                    | <b>Source</b>     | <b>Catalog #</b> |
| rPGC-1a Pan F- TCTGGGTGGATTGAAGTGGTG         | UW Biotech Center | N/A              |
| rPGC-1a Pan R- CGAATATGTTTCGCGGGCTCA         | UW Biotech Center | N/A              |
| rPGC-1aX1 F- AGTGACAGCCAGCCTAC               | UW Biotech Center | N/A              |
| rPGC-1aX1 R- CAATCCACCCAGAAAGCTGTCT          | UW Biotech Center | N/A              |
| rPGC-1aX2 F- TTGTGGACTCTGGTGAGATGG           | UW Biotech Center | N/A              |
| rPGC-1aX2 R- CAATCCACCCAGAAAGCTGTCT          | UW Biotech Center | N/A              |
| rPGC-1a4 F- TCACACCAAACCCACAGAGA             | UW Biotech Center | N/A              |
| rPGC-1a4 R- CTGGAAGATATGGCACAT               | UW Biotech Center | N/A              |
| rBDNF F- ATTAGCGAGTGGGTCACAGC                | UW Biotech Center | N/A              |
| rBDNF R- TGGCCTTTTGATACCGGGAC                | UW Biotech Center | N/A              |
| rCox4i1 F- GCCTAATTGGCAAGAGAGC               | UW Biotech Center | N/A              |
| rCox4i1 R- TGGGCCACATCAGGCAAG                | UW Biotech Center | N/A              |
| rCox8a F- GTCATGTCTTCCCTGACGC                | UW Biotech Center | N/A              |
| rCox8a R- AACACACGAAGCAGGAAGTG               | UW Biotech Center | N/A              |
| rCox5b F- ACCCGAATCTAGTCCCTTCC               | UW Biotech Center | N/A              |
| rCox5b R- CAGCCACAACCAGATGACAG               | UW Biotech Center | N/A              |
| rPKD4 F- AGCTGGTACATCCAGAGCCT                | UW Biotech Center | N/A              |
| rPKD4 R- TCGAACTTTGACCAGCGTGT                | UW Biotech Center | N/A              |
| rGSK3b F- AGAAGAGCCATCATGTCTGGG              | UW Biotech Center | N/A              |



|                                           |                   |                  |
|-------------------------------------------|-------------------|------------------|
| rGSK3b R- CCAAAGCTGAAGGCTGCTG             | UW Biotech Center | N/A              |
| <b>Mouse Primers (hippocampus)</b>        | <b>Source</b>     | <b>Catalog #</b> |
| mPGC-1a Pan F- TGATGTGAATGACTTGGATACAGACA | UW Biotech Center | N/A              |
| mPGC-1a Pan R- GCTCATTGTTGTACTGGTTGGATATG | UW Biotech Center | N/A              |
| mPGC-1a1 F- GGACATGTGCAGCCAAGACTCT        | UW Biotech Center | N/A              |
| mPGC-1a1 R- CACTTCAATCCACCCAGAAAGCT       | UW Biotech Center | N/A              |
| mPGC-1a2 F- CCACCAGAATGAGTGACATGGA        | UW Biotech Center | N/A              |
| mPGC-1a2 R- GTTCAGCAAGATCTGGGCAA          | UW Biotech Center | N/A              |
| mPGC-1a4 F- TCACACCAAACCCACAGAAA          | UW Biotech Center | N/A              |
| mPGC-1a4 R- CTG GAA GAT ATG GCA CAT       | UW Biotech Center | N/A              |
